# Supplementary material
Source: publisher figshare collection journal article supplement (https://frontiersin.figshare.com/ndownloader/files/31794809)
Supplement: Supplementary file [file 31794809]

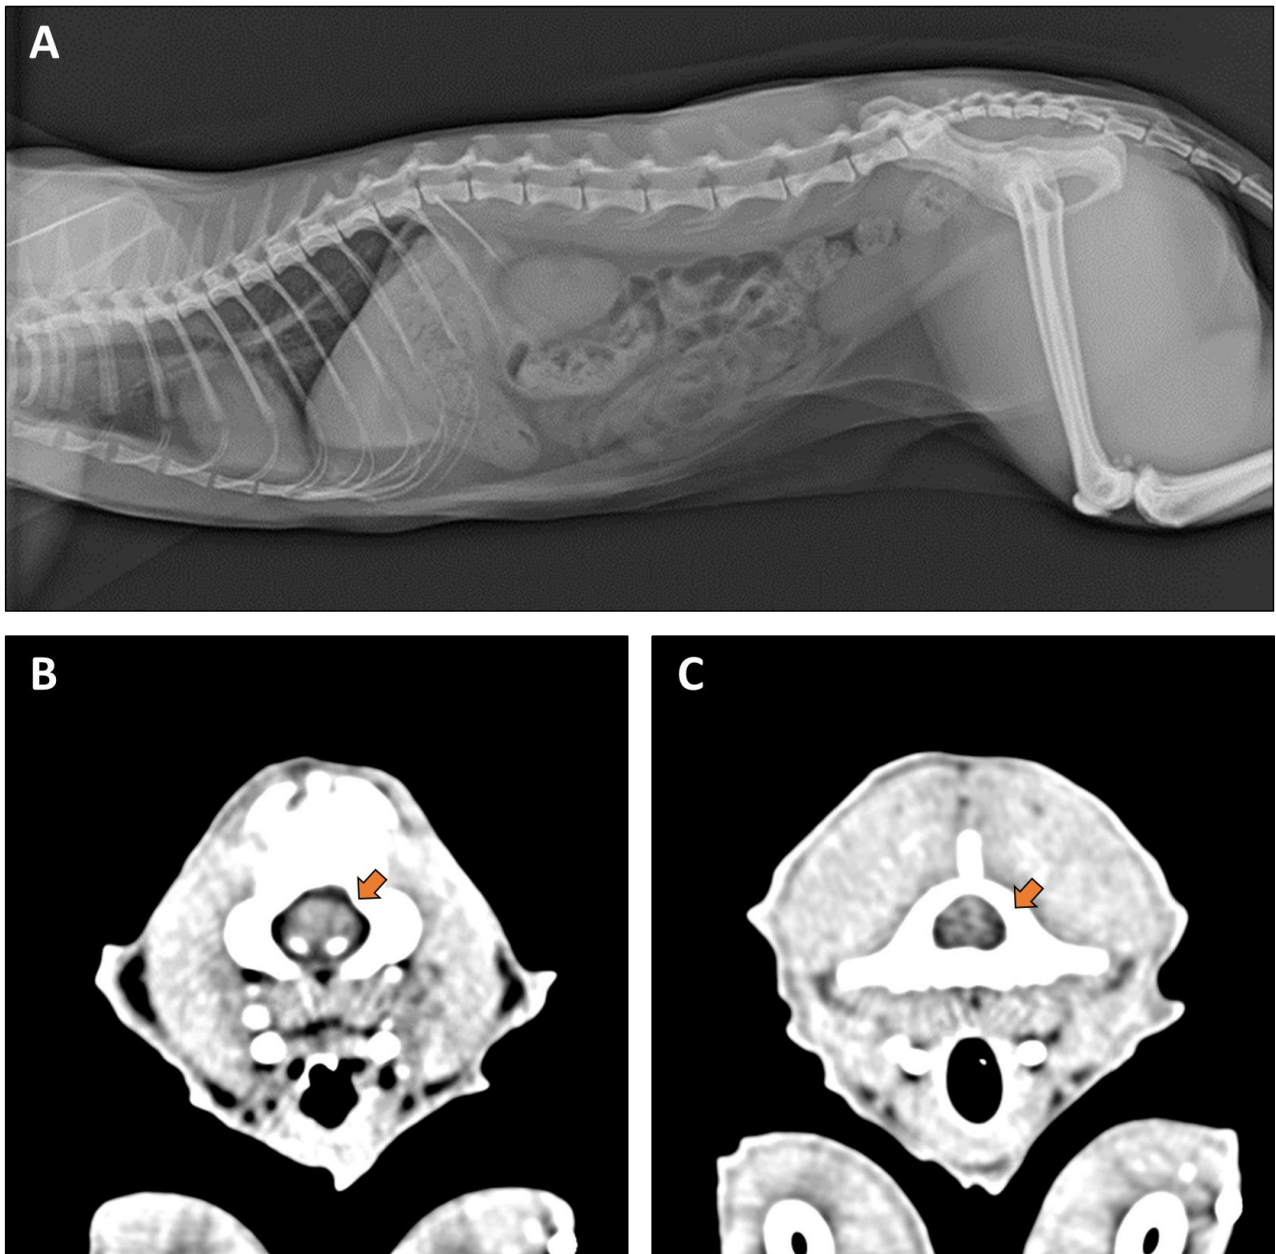

**Supplementary Figure 1** | Imaging diagnostics, cat. (A) Latero-lateral radiograph of the thoracic cavity and the abdomen lacking abnormalities in the skeleton and the spinal cord. (B, C) Transversal computed tomography sections of the cranial cervical spinal cord. No abnormalities were detected in the spinal canal (arrows).
